# Supplementary material for: Therapeutic Effect of a Newly Isolated Lytic Bacteriophage against Multi-Drug-Resistant Cutibacterium acnes Infection in Mice
Source: MDPI journal article supplement (doi:10.3390/ijms22137031), 2021-06-29
Supplement: s1 [file s1]

*Supplementary Materials*

*Article*

**Therapeutic effect of a newly isolated lytic bacteriophage against multi-drug resistant *Cutibacterium acnes* infection in mice**

**Ho Yin Pekkle Lam**<sup>1,2</sup>, **Meng-Jiun Lai**<sup>3</sup>, **Ting-Yu Chen**<sup>3</sup>, **Wen-Jui Wu**<sup>3</sup>, **Shih-Yi Peng**<sup>1,2,\*</sup>,  
**Kai-Chih Chang**<sup>3,4,\*</sup>

<sup>1</sup> Institute of Medical Sciences, Tzu Chi University, Hualien 970, Taiwan; pekkelavabo@gmail.com (H.Y.P.L.)

<sup>2</sup> Department of Biochemistry, School of Medicine, Tzu Chi University, Hualien 970, Taiwan

<sup>3</sup> Department of Laboratory Medicine and Biotechnology, Tzu Chi University, Hualien 970, Taiwan; monjou@mail.tcu.edu.tw (M.-J.L.); 104323103@gms.tcu.edu.tw (T.-Y.C.); w200811@mail.tcu.edu.tw (W.-J.W)

<sup>4</sup> Department of Laboratory Medicine, Buddhist Tzu Chi General Hospital, Hualien 970, Taiwan

\* Correspondence: pengsy@mail.tcu.edu.tw (S.-Y.P.); kaichih@mail.tcu.edu.tw (K.-C.C.)

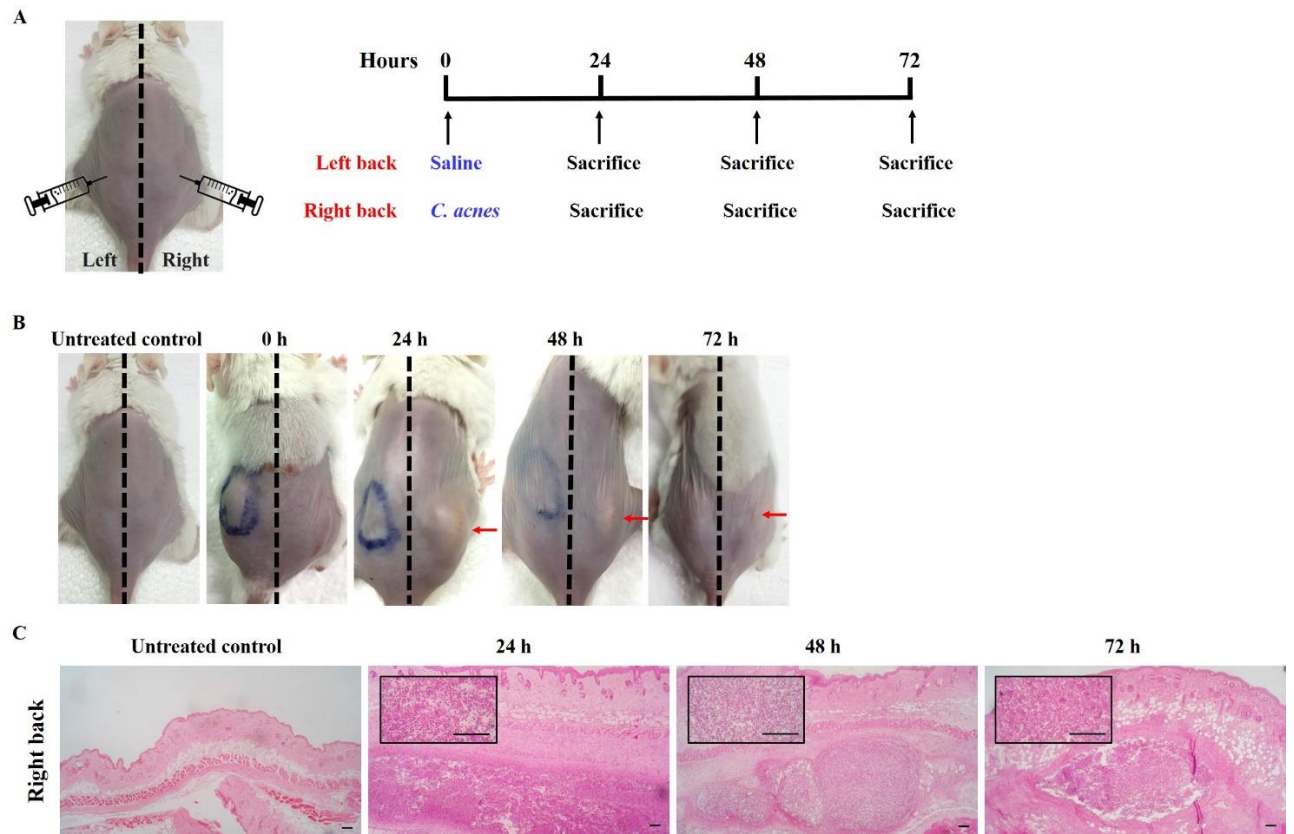

**Figure S1:** Mice injected with saline and *C. acnes*. (A) Experimental design scheme. (B) Phenotype of mice injected with saline or *C. acnes*. (C) Representative H&E-stained images showing the histological change of the treated mice. Images are shown at 40× and 100× magnification with scale bar = 100 μm.

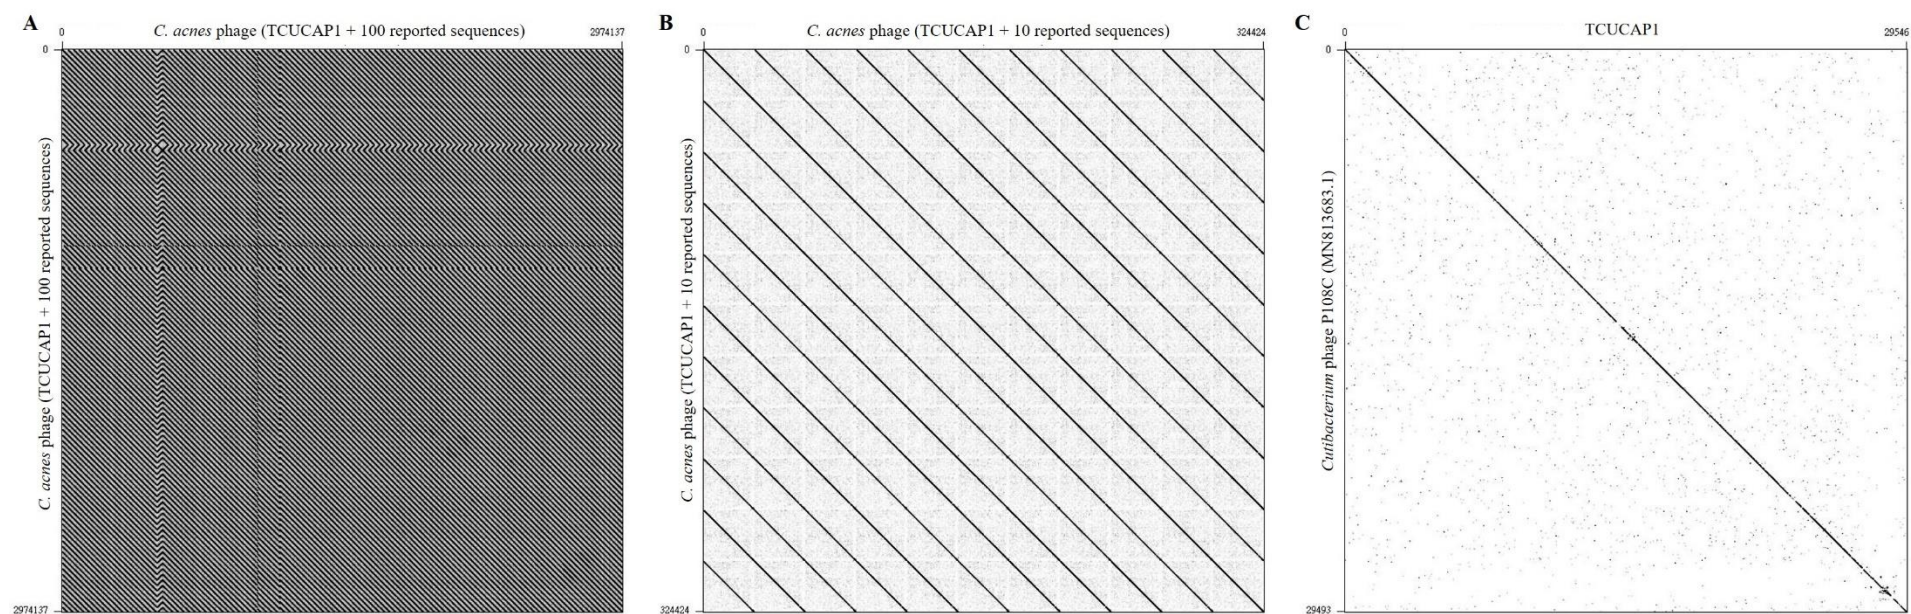

**Figure S2:** Dot plot nucleotide sequence comparisons of TCUCAP1 and other *C. acnes* phages. Each was compared with itself using the dot plot program Gepard.

**Table S1. Functional classification of 56 ORFs in the TCUCAP1 genome**

| Label | Start | Stop  | Length (nt/aa) | Product                         | Function protein                         | Accession      | Query Cover | E value   | Identity |
|-------|-------|-------|----------------|---------------------------------|------------------------------------------|----------------|-------------|-----------|----------|
| P2_1  | 2     | 88    | 87/29          | Hypothetical protein            | -                                        | -              | -           | -         | -        |
| P2_2  | 60    | 386   | 327/109        | Putative excinuclease           | <i>Propionibacterium</i> phage PHL112N00 | YP_008531545.1 | 99.00%      | 2.00E-68  | 97.22%   |
| P2_3  | 391   | 1902  | 1512/504       | Terminase large subunit         | <i>Cutibacterium</i> phage P108C         | QHB37093.1     | 99.00%      | 0         | 99.01%   |
| P2_4  | 1899  | 3224  | 1326/442       | Portal protein                  | <i>Cutibacterium</i> phage P109C         | QHB37094.1     | 99.00%      | 0         | 100.00%  |
| P2_5  | 3231  | 3986  | 756/252        | Hypothetical protein            | <i>Propionibacterium</i> phage pa63      | AUV62248.1     | 99.00%      | 0         | 99.20%   |
| P2_6  | 4097  | 4654  | 558/186        | Scaffold protein                | <i>Propionibacterium</i> phage PHL009M11 | YP_009147229.1 | 99.00%      | 2.00E-126 | 100.00%  |
| P2_7  | 4661  | 5608  | 948/316        | Major capsid protein            | <i>Cutibacterium</i> phage P108C         | QHB37097.1     | 99.00%      | 0         | 99.37%   |
| P2_8  | 5652  | 6113  | 462/154        | Head-to-tail adaptor            | <i>Cutibacterium</i> phage P108C         | QHB37098.1     | 99.00%      | 5E-109    | 100.00%  |
| P2_9  | 6079  | 6621  | 543/181        | Hypothetical protein            | <i>Propionibacterium</i> phage Pacnes P2 | ASJ79976.1     | 27.00%      | 6.00E-17  | 82.00%   |
| P2_10 | 6876  | 7127  | 252/84         | Minor tail protein              | <i>Propionibacterium</i> phage Pirate    | YP_009159973.1 | 98.00%      | 2.00E-50  | 98.00%   |
| P2_11 | 7180  | 7812  | 633/211        | Hypothetical protein            | <i>Cutibacterium</i> <i>acnes</i>        | WP_002518829.1 | 99.00%      | 5.00E-150 | 99.52%   |
| P2_12 | 7839  | 8135  | 297/99         | Hypothetical protein ACQ78_gp12 | <i>Propionibacterium</i> phage PHL070N00 | YP_009146905.1 | 98.00%      | 8.00E-62  | 97.96%   |
| P2_13 | 8234  | 8521  | 288/96         | Hypothetical protein ACQ85_gp13 | <i>Propionibacterium</i> phage PHL009M11 | YP_009147237.1 | 98.00%      | 9.00E-63  | 98.95%   |
| P2_14 | 8529  | 11294 | 2766/922       | Tape measure protein            | <i>Propionibacterium</i> phage PHL095N00 | YP_009153263.1 | 99.00%      | 0         | 97.18%   |
| P2_15 | 11310 | 12251 | 942/314        | Minor tail protein              | <i>Cutibacterium</i> phage P108C         | QHB37106.1     | 99.00%      | 0         | 96.81%   |
| P2_16 | 12259 | 13416 | 1158/386       | Putative protease               | <i>Propionibacterium</i> phage PHL152M00 | YP_009152422.1 | 95.00%      | 0.00E+00  | 97.01%   |
| P2_17 | 13433 | 14251 | 819/273        | Hypothetical protein P751_gp17  | <i>Propionibacterium</i> phage PHL071N05 | YP_008531697.1 | 99.00%      | 0         | 98.16%   |
| P2_18 | 14293 | 14556 | 264/88         | Hypothetical protein D291_gp18  | <i>Propionibacterium</i> phage P100D     | YP_006907147.1 | 98.00%      | 5.00E-53  | 96.55%   |
| P2_19 | 14559 | 15365 | 807/269        | Minor tail protein              | <i>Propionibacterium</i> phage Ouroboros | YP_009160297.1 | 99.00%      | 2.00E-157 | 92.91%   |
| P2_20 | 15586 | 16266 | 681/227        | Putative amidase                | <i>Propionibacterium</i> phage PHL115M02 | AGI12651.1     | 99.00%      | 2.00E-162 | 97.35%   |
| P2_21 | 16279 | 16674 | 396/132        | Holin                           | <i>Cutibacterium</i> phage P108C         | QHB37112.1     | 99.00%      | 4.00E-86  | 99.24%   |
| P2_22 | 16671 | 16778 | 108/36         | Hypothetical protein            | -                                        | -              | -           | -         | -        |
| P2_23 | 16960 | 17250 | 291/97         | Gp23                            | <i>Propionibacterium</i> phage PAS50     | YP_004414727.1 | 79.00%      | 3.00E-27  | 87.01%   |
| P2_24 | 17263 | 17466 | 204/68         | Hypothetical protein            | <i>Propionibacterium</i> phage PacnesP1  | ASJ79917.1     | 57.00%      | 3.00E-08  | 76.92%   |
| P2_25 | 17632 | 17922 | 291/97         | Hypothetical protein            | <i>Propionibacterium</i> phage PacnesP1  | ASJ79916.1     | 73.00%      | 2.00E-08  | 69.01%   |
| P2_26 | 17888 | 17983 | 96/32          | Hypothetical protein            | -                                        | -              | -           | -         | -        |
| P2_27 | 18517 | 18717 | 201/67         | Hypothetical protein            | <i>Cutibacterium</i> phage PAVL34        | QPB11818.1     | 65.00%      | 1.00E-09  | 68.18%   |
| P2_28 | 18976 | 19143 | 168/56         | Hypothetical protein            | <i>Cutibacterium</i> phage PAVL33        | QPB11771.1     | 98.00%      | 3.00E-10  | 61.82%   |
| P2_29 | 19128 | 19292 | 165/55         | Hypothetical protein            | -                                        | -              | -           | -         | -        |
| P2_30 | 19700 | 19864 | 165/55         | Hypothetical protein            | -                                        | -              | -           | -         | -        |
| P2_31 | 19885 | 20202 | 318/106        | Hypothetical protein            | -                                        | -              | -           | -         | -        |
| P2_32 | 20145 | 20285 | 141/47         | Hypothetical protein            | <i>Cutibacterium</i> phage PAVL33        | QPB11775.1     | 91.00%      | 5.00E-08  | 65.12%   |
| P2_33 | 20526 | 20765 | 240/80         | Hypothetical protein            | -                                        | -              | -           | -         | -        |
| P2_34 | 20722 | 20928 | 207/69         | Hypothetical protein            | -                                        | -              | -           | -         | -        |
| P2_35 | 21032 | 21184 | 153/51         | Hypothetical protein            | -                                        | -              | -           | -         | -        |
| P2_36 | 21488 | 21592 | 105/35         | Hypothetical protein            | <i>Cutibacterium</i> phage FD3           | QPB11625.1     | 97.00%      | 4.00E-10  | 91.18%   |

|       |       |       |         |                                |                                              |                |        |          |        |
|-------|-------|-------|---------|--------------------------------|----------------------------------------------|----------------|--------|----------|--------|
| P2_37 | 21959 | 22093 | 135/45  | Hypothetical protein           | <i>Cutibacterium</i> phage PAVL34            | QPB11828.1     | 95.00% | 1.00E-14 | 83.72% |
| P2_38 | 22142 | 22390 | 249/83  | Hypothetical protein           | <i>Cutibacterium</i> phage PAVL21            | QPB11724.1     | 44.00% | 2.00E-12 | 86.49% |
| P2_39 | 22494 | 22586 | 93/31   | Hypothetical protein           | <i>Cutibacterium</i> phage PAVL21            | QPB11725.1     | 96.00% | 7.00E-11 | 96.67% |
| P2_40 | 22605 | 22706 | 102/34  | Hypothetical protein           | <i>Cutibacterium</i> phage PAVL21            | QPB11726.1     | 97.00% | 3.00E-11 | 84.85% |
| P2_41 | 22748 | 22855 | 108/36  | Hypothetical protein           | <i>Cutibacterium</i> phage FD1               | QPB11524.1     | 97.00% | 5.00E-13 | 94.29% |
| P2_42 | 22881 | 23285 | 405/135 | Hypothetical protein           | <i>Cutibacterium</i> phage PAVL34            | QPB11832.1     | 21.00% | 0.002    | 82.76% |
| P2_43 | 23944 | 24117 | 174/58  | Hypothetical protein           | -                                            | -              | -      | -        | -      |
| P2_44 | 24636 | 24809 | 174/58  | Hypothetical protein           | <i>Cutibacterium</i> phage PAVL21            | QPB11732.1     | 94.00% | 3.00E-21 | 77.19% |
| P2_45 | 24951 | 25118 | 168/56  | Hypothetical protein           | -                                            | -              | -      | -        | -      |
| P2_46 | 25248 | 25397 | 150/50  | Hypothetical protein           | -                                            | -              | -      | -        | -      |
| P2_47 | 25593 | 25934 | 342/114 | Hypothetical protein           | <i>Cutibacterium</i> phage PAVL34            | QPB11838.1     | 32.00% | 4.00E-08 | 75.68% |
| P2_48 | 25942 | 26124 | 183/61  | Hypothetical protein           | -                                            | -              | -      | -        | -      |
| P2_49 | 26286 | 26408 | 123/41  | Hypothetical protein           | <i>Cutibacterium</i> phage FD1               | QPB11532.1     | 90.00% | 2.00E-10 | 83.78% |
| P2_50 | 26412 | 26720 | 309/103 | Hypothetical protein           | <i>Cutibacterium</i> phage PAVL21            | QPB11738.1     | 53.00% | 6.00E-19 | 83.64% |
| P2_51 | 26906 | 27043 | 138/46  | Hypothetical protein           | <i>Propionibacterium</i> phage pa29399-1-D_1 | AUV62200.1     | 86.00% | 3.00E-13 | 82.50% |
| P2_52 | 27342 | 27500 | 159/53  | Hypothetical protein P759_gp43 | <i>Propionibacterium</i> phage PHL010M04     | YP_008531678.1 | 60.00% | 4.00E-09 | 87.50% |
| P2_53 | 28899 | 29054 | 156/52  | Hypothetical protein           | <i>Cutibacterium</i> phage FD2               | QPB11588.1     | 48.00% | 1.00E-05 | 84.00% |
| P2_54 | 29176 | 29310 | 135/45  | Hypothetical protein           | <i>Propionibacterium</i> phage PacnesP1      | ASJ79897.1     | 97.00% | 1.00E-14 | 79.55% |
| P2_55 | 29294 | 29467 | 174/58  | Hypothetical protein           | <i>Cutibacterium</i> phage FD2               | QPB11590.1     | 77.00% | 3.00E-20 | 91.11% |
| P2_56 | 29406 | 29546 | 141/47  | Hypothetical protein           | -                                            | -              | -      | -        | -      |
